# Supplementary material
Source: PubMed Central journal article supplement (PMC5363201)
Supplement: mmc1.pdf [file mmc1.pdf]

YMTHE, Volume 25

## **Supplemental Information**

**Motor-Coordination and Cognitive Dysfunction**

**Caused by Mutant TDP-43 Could Be Reversed**

**by Inhibiting Its Mitochondrial Localization**

**Wenzhang Wang, Hiroyuki Arakawa, Luwen Wang, Ogoegbunam Okolo, Sandra L. Siedlak, Yinfei Jiang, Ju Gao, Fei Xie, Robert B. Petersen, and Xinglong Wang**

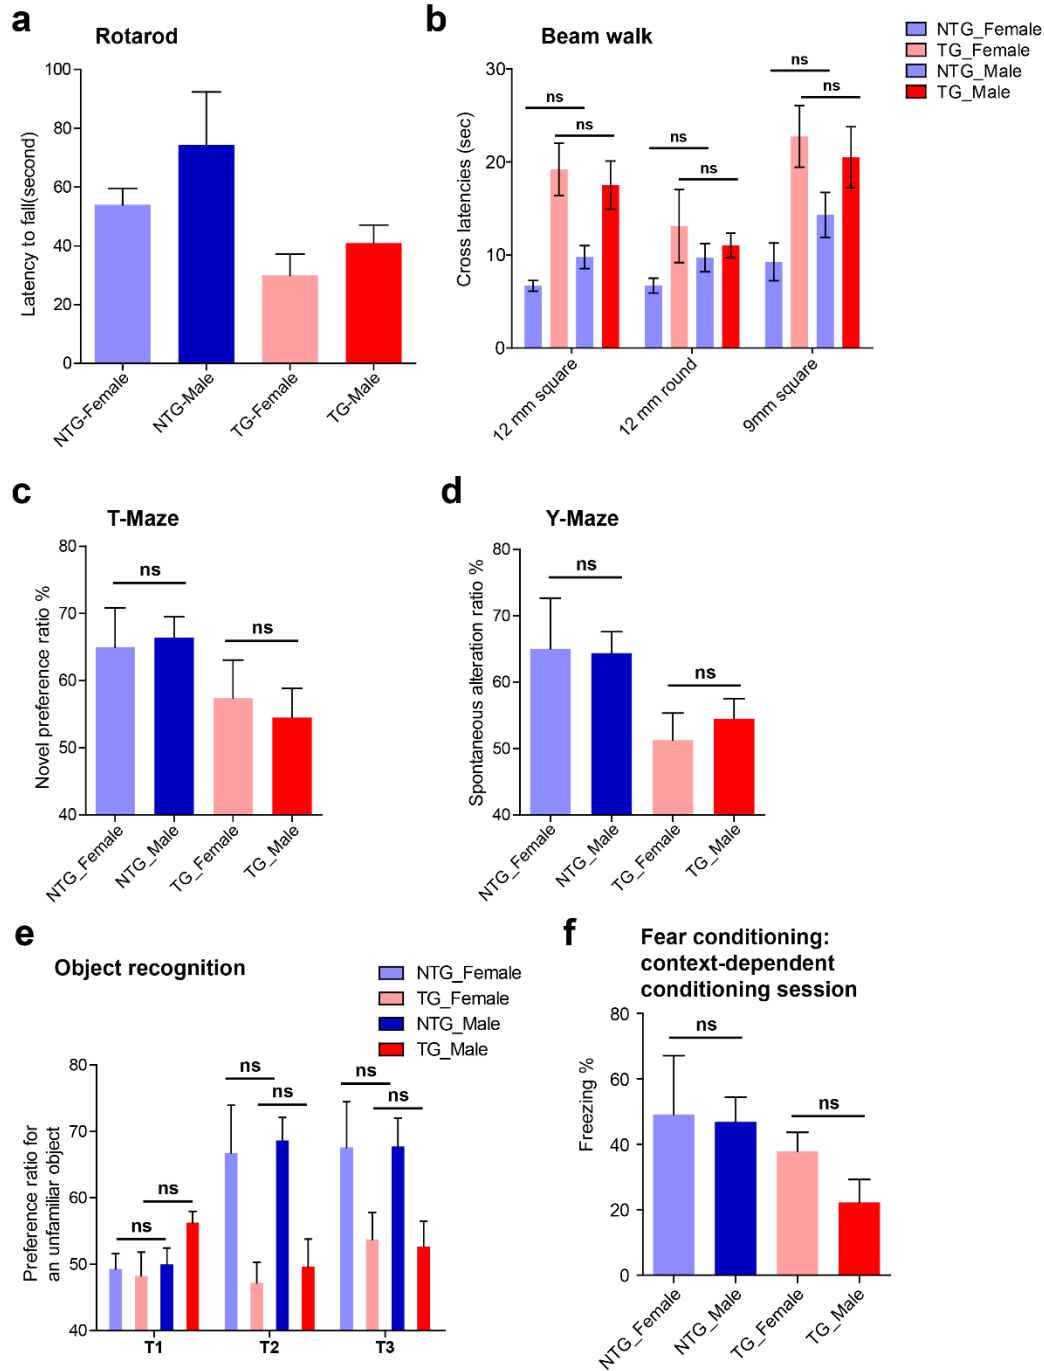

**Supplemental Figure 1.** Comparison of motor coordination and balance and cognitive performances between female and male NTG and TG mice (related to Figure 1). **(a, b)** Motor coordination and balance in female and male NTG and hemizygous TDP-43<sup>M337V</sup> mice assessed by rotarod **(a)** and beam-walking tests **(b)**. **(c–f)** Cognitive performances of female and male NTG and hemizygous TDP-43<sup>M337V</sup> mice evaluated by Y maze **(c)**, T maze **(d)**, novel object recognition **(e)** and fear conditioning tests **(e)**. All mice are at 8-9 month old. n= 11 for NTG (8 male/3 female) and 18 for TG (10 male/8 female). Data analyzed using two-way ANOVA followed by Bonferroni multiple comparisons. All data presented as means ± SEM; ns: non-significant.

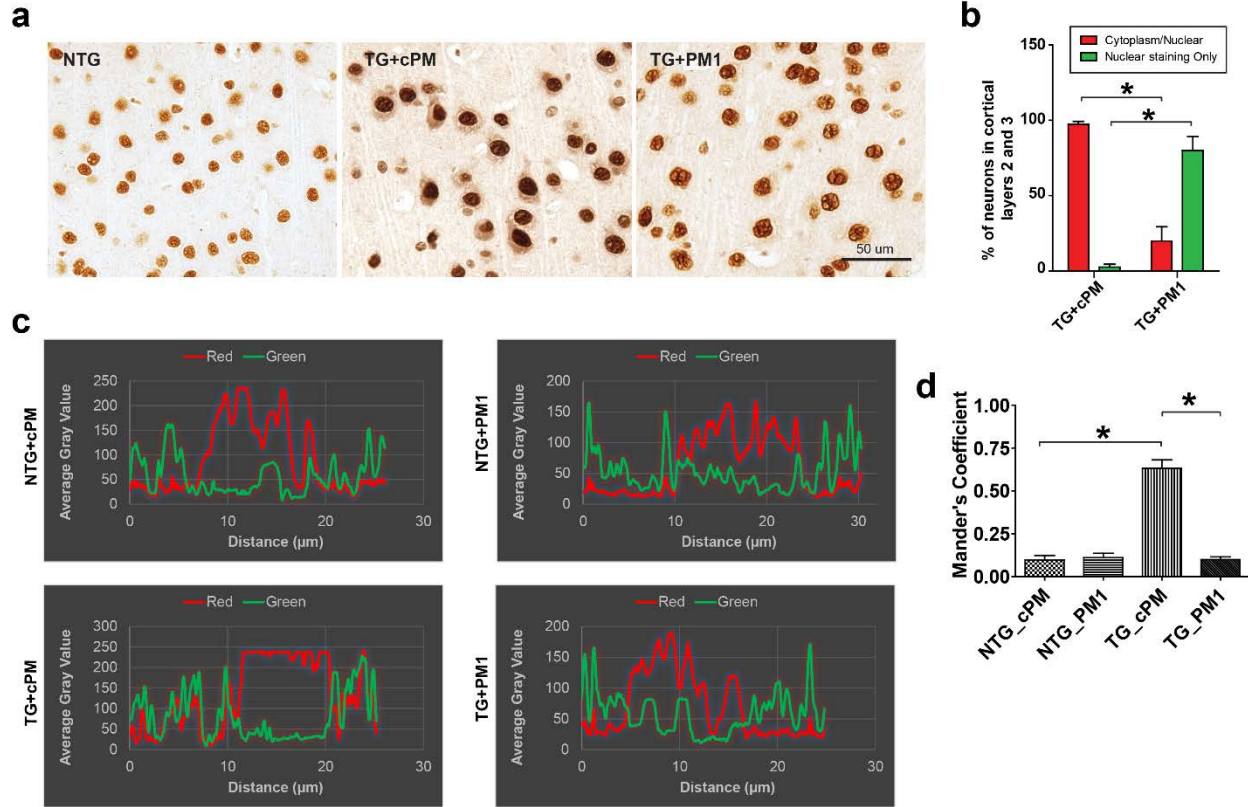

**Supplemental Figure 2.** (a, b) Representative images (a) and quantification (b) of percentage of neurons with only nuclear TDP-43 staining or neurons with both nuclear and significant cytoplasmic TDP-43 in cortical layers II/III of 11 month old hemizygous TDP-43<sup>M337V</sup> mice treated with cPM or PM1 (Related to Figure 3b). Neurons were stained by a pan-TDP-43 antibody. (c) Line scan analysis of TDP-43 and Tom20 by Image J RGB Profile Plot plugin, based on white solid lines shown in merged images of Figure 3b. The line-scan analysis was performed by Image J RGB Profile Plot plugin using lines with “2” width. (d) Quantification of degree of co-localization between cytoplasmic TDP-43 and Tom20 in cortical neurons from indicated mice by Manders's coefficient (% of both red and green signal co-localize; range from 0–1) that is independent of fluorescence intensity. A Mander's coefficient greater than 0.5 is considered significant co-localization (“0” means non-overlapping while “1” indicates complete overlapping). Data analyzed using two-way ANOVA followed by Bonferroni multiple comparisons. All data presented as means  $\pm$  SEM; \* $p$ <0.05.

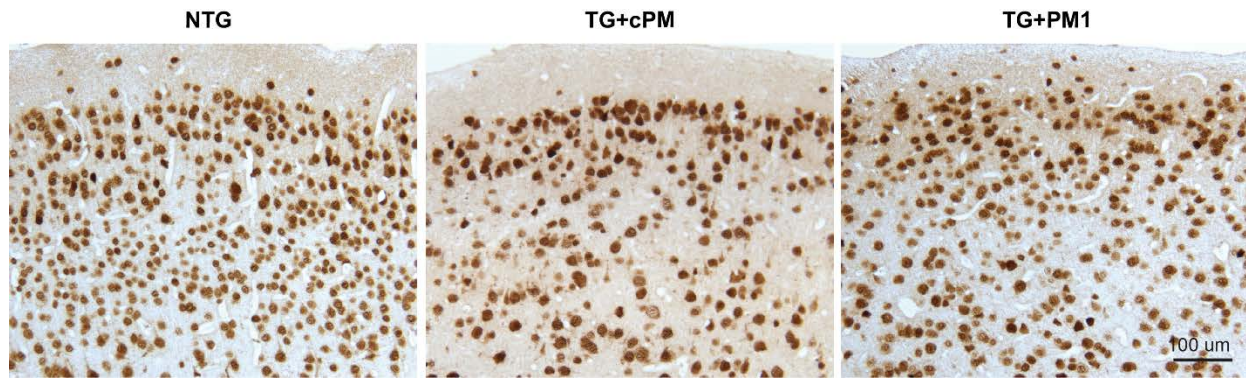

**Supplemental Figure 3.** Representative images of immunohistochemistry on cortical layers I-V with a specific antibody against neuronal marker NeuN in 11 month old NTG and hemizygous TDP-43<sup>M337V</sup> mice treated with 1.5 mg/kg/day cPM (control peptide for PM1) or PM1 continuously for 6 weeks by subcutaneous infusion. NTG: non-transgenic wild type mice; TG+cPM: hemizygous TDP-43<sup>M337V</sup> mice treated with cPM; TG+PM1: hemizygous TDP-43<sup>M337V</sup> mice treated with PM1.

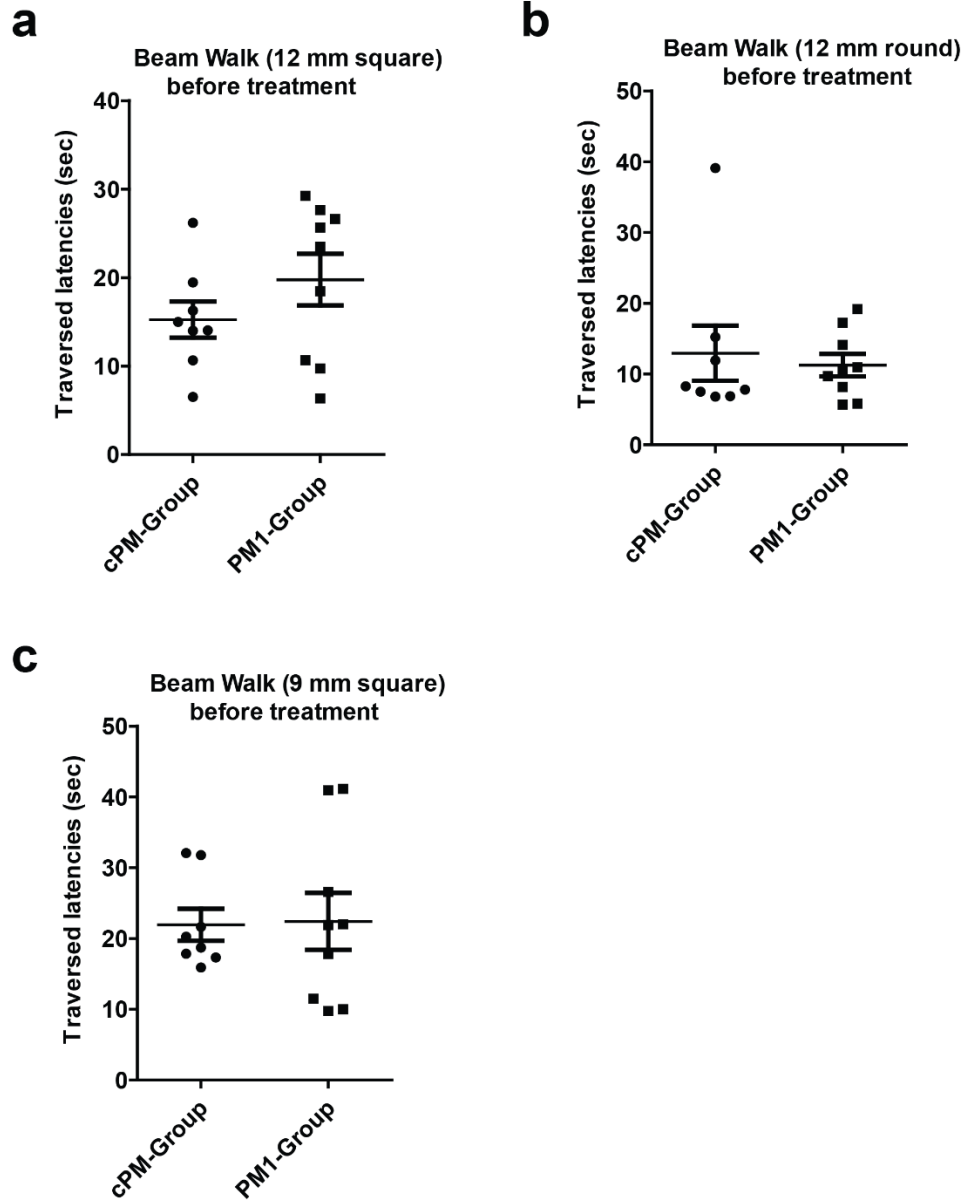

**Supplemental Figure 4.** Motor coordination and balance of mice in two groups of hemizygous TDP-43<sup>M337V</sup> mice assessed by the latency to traverse each beam.
